# Supplementary material
Source: publisher site journal article supplement (https://thieme-connect.com/media/10.1055-s-00035024/201305/supmat/10-1160-th12-10-0739-supp.pdf)
Supplement: Supplementary file 1 [file 10-1160-th12-10-0739-supp.pdf]

**Supplementary Figure to Pählman et al. “Antimicrobial activity of fibrinogen and fibrinogen-derived peptides – a novel link between coagulation and innate immunity” (Thromb Haemost 2013; 109.5)**

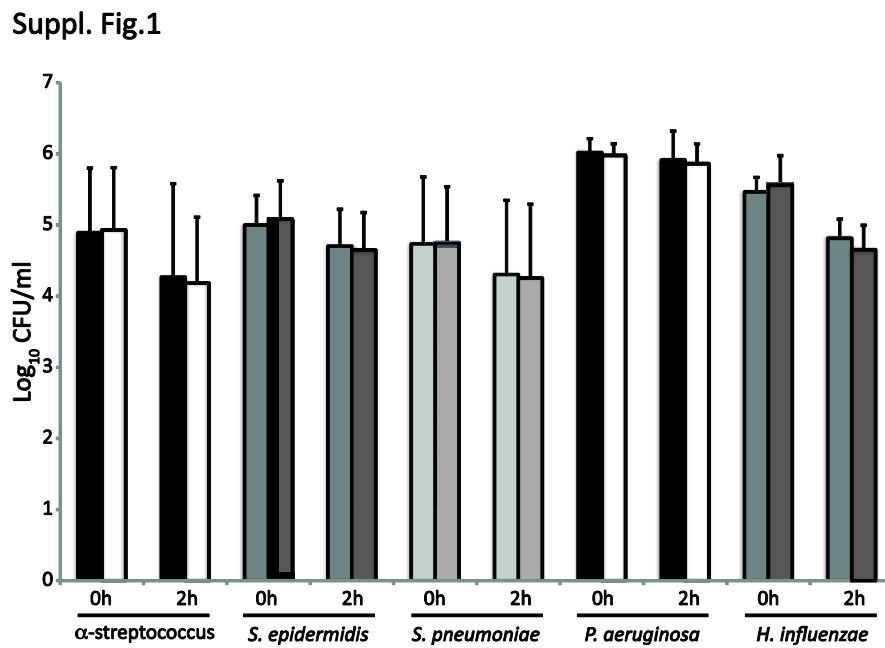

**Suppl. Figure 1: Anti-microbial effect of thrombin-activated plasma.** Different bacterial species ( $5 \times 10^5$  CFU/ml in 12,9 mM sodium citrate) were incubated with citrated plasma diluted 1:100 in sodium citrate in the absence (filled bars) or presence (striped bars) of thrombin. At 0 and 2 h, bacterial numbers were determined by plating serial dilutions of the sample on agar plates. The figure shows means +/- SD of at least three independent experiments.
